# Supplementary material for: Fluoride-regulated colorimetric and fluorometric switch through B–F dynamic covalent reactions of AIEgens
Source: Royal Society of Chemistry journal article supplement (doi:10.1039/d2me00244b), 2023-01-01
Supplement: d2me00244b1.pdf [file d2me00244b1.pdf]

## Electronic Supplementary Information *for*

# Fluoride-Regulated Colorimetric and Fluorometric Switch Based on AIEgens through B-F Dynamic Covalent Reaction

Yuqing Zhu, Xinni Ping, Xiangting Wang, Xuting Cai, Jiaqi Zuo, Zhaosheng Qian and Hui Feng \*

\*Corresponding author. E-mail: [fenghui@zjnu.cn](mailto:fenghui@zjnu.cn).

Key Laboratory of the Ministry of Education for Advanced Catalysis Materials, College of Chemistry and Materials Science, Zhejiang Normal University, Jinhua 321004, People's Republic of China

## Table of Contents

### 1. Experimental Section

### 2. Supplementary Schemes and Figures

**2.1 Scheme S1.** Synthesis routes of DTDB (a), TTDB (b), and FDTDB (c).

**2.2 Figure S1.** PL intensity spectra and images of FDTDB in THF (50.0 mM) with increasing amounts of water from 0% to 90%.

**2.3 Figure S2.** Time-resolved PL decay curve of FDTDB in solid state.

**2.4 Figure S3.** Time-resolved PL decay curves of (a) DTDB-2F, (b) TTDB-F, and (c) FDTDB-F in dispersed state, and (d) DTDB-2F, (e) TTDB-F, and (f) FDTDB-F in THF solution (500  $\mu$ M).

**2.5 Figure S4.** Changes in UV-Vis absorption spectra of (a) DTDB (500  $\mu$ M), (b) TTDB (500  $\mu$ M) and (c) FDTDB (500  $\mu$ M) in THF solution upon addition 0-1eq. of TBAF.

**2.6 Figure S5.** A line graph of PL intensity and  $F^-$  concentration of DTDB (a), TTDB(b) and FDTDB(c) in THF (500  $\mu$ M). A line graph of Absorbance and  $F^-$  concentration of DTDB (d), TTDB(e) and FDTDB(f) in THF (500  $\mu$ M).

**2.7 Figure S6.** Recycling of DTDB (a), TTDB (b), and FDTDB (c) in THF solution (500  $\mu$ M) as a function of addition  $F^-$  (TBAF) and  $Ca^{2+}$  ( $CaCl_2$ ) respectively.

**2.8 Figure S7.** Calibration curve between PL intensity and  $F^-$  concentration in the scope of 1.1–120.0  $\mu$ M.

**2.9 Figure S8.** Change in PL spectra of DTDB in solid state upon addition of NaF. Insets: Fluorescent photographs of these solids were taken under UV light.

**2.10 Figure S9.** Change in PL spectra of DTDB in filter papers increasing the content of fluoride ion (NaF). Insets: Photographs showing fluorescence change after adding different amounts of fluoride ion from 0  $\mu$ g to 912.0  $\mu$ g.

### 3. NMR and HRMS Spectra of Compounds

**3.1 Figure S10.**  $^1\text{H}$  NMR spectrum of (Z)-1,2-diphenyl-1,2-bis(4,4,5,5-tetramethyl-1,3,2-dioxaborolan-2-yl)ethene) (DTDB) in  $\text{CDCl}_3$ .

**3.2 Figure S11.**  $^{13}\text{C}$  NMR spectrum of (Z)-1,2-diphenyl-1,2-bis(4,4,5,5-tetramethyl-1,3,2-dioxaborolan-2-yl)ethene) (DTDB) in  $\text{CDCl}_3$ .

**3.3 Figure S12.**  $^1\text{H}$  NMR spectrum of (4,4,5,5-tetramethyl-2-(1,2,2-triphenylvinyl)-1,3,2-dioxaborolane) (TTDB) in  $\text{CDCl}_3$ .

**3.4 Figure S13.**  $^{13}\text{C}$  NMR spectrum of (4,4,5,5-tetramethyl-2-(1,2,2-triphenylvinyl)-1,3,2-dioxaborolane) (TTDB) in  $\text{CDCl}_3$ .

**3.5 Figure S14.**  $^1\text{H}$  NMR spectrum of (E)-2-(2-(furan-2-yl)-1,2-diphenylvinyl)-4,4,5,5-tetramethyl-1,3,2-dioxaborolane) (FDTDB) in  $\text{CDCl}_3$ .

**3.6 Figure S15.**  $^{13}\text{C}$  NMR spectrum of (E)-2-(2-(furan-2-yl)-1,2-diphenylvinyl)-4,4,5,5-tetramethyl-1,3,2-dioxaborolane) (FDTDB) in  $\text{CDCl}_3$ .

**3.7 Figure S16.** High-resolution mass spectrum of (Z)-1,2-diphenyl-1,2-bis(4,4,5,5-tetramethyl-1,3,2-dioxaborolan-2-yl)ethene) (DTDB).

**3.8 Figure S17.** High-resolution mass spectrum of (4,4,5,5-tetramethyl-2-(1,2,2-triphenylvinyl)-1,3,2-dioxaborolane) (TTDB).

**3.9 Figure S18.** High-resolution mass spectrum of (E)-2-(2-(furan-2-yl)-1,2-diphenylvinyl)-4,4,5,5-tetramethyl-1,3,2-dioxaborolane) (FDTDB)

## 1. Experimental Section

**Synthesis of ((Z)-1,2-diphenyl-1,2-bis(4,4,5,5-tetramethyl-1,3,2-dioxaborolan-2-yl)ethene) (DTDB).** A mixture of tetrakis(triphenylphosphine)platinum ( $\text{Pt}(\text{PPh}_3)_4$ ) (0.35 g, 1 mol%), bis(pinacolato)diboron (14.25 g, 56.0 mmol) and diphenylacetylene (5.00 g, 28.0 mmol) were added in DMF (150 mL) under the protection of  $\text{N}_2$ , and the mixture was heated at 90 °C for 24 h. After the reaction was completed, the mixture was poured into water and extracted three times with dichloromethane, and then the organic layer was dried by  $\text{MgSO}_4$ . The crude product of DTDB was obtained after removal of the solvent under reduced pressure. DTDB (4.5 g) was obtained by washing several times with ethanol as a white solid in a 38% yield. Molecular formula:  $\text{C}_{26}\text{H}_{34}\text{B}_2\text{O}_4$ .  $^1\text{H}$  NMR (600 MHz,  $\text{CDCl}_3$ )  $\delta$  (ppm) 7.09–7.00 (m, 6H), 6.96–6.93 (m, 4H), 1.32 (s, 24H).  $^{13}\text{C}$  NMR (150 MHz,  $\text{CDCl}_3$ )  $\delta$  (ppm) 141.25, 129.31, 127.42, 125.79, 84.07, 24.89. HRMS (ESI)  $m/z$ :  $[\text{M}+\text{H}]^+$  433.2607 (calcd. for  $\text{C}_{26}\text{H}_{34}\text{B}_2\text{O}_4$ ,  $[\text{M}+\text{H}]^+$  433.2643).

**Synthesis of (4,4,5,5-tetramethyl-2-(1,2,2-triphenylvinyl)-1,3,2-dioxaborolane) (TTDB).** A mixture of (Z)-1,2-diphenyl-1,2-bis(4,4,5,5-tetramethyl-1,3,2-dioxaborolan-2-yl)ethene (DTDB) (2.00 g, 4.63 mmol), bromobenzene (1.09 g, 6.95 mmol), potassium carbonate (1.28 g, 9.25 mmol) and  $\text{Pd}(\text{PPh}_3)_4$  (53.47 mg, 0.046 mmol) were added in a mixed solvent containing THF (80 mL) and toluene (50 mL) under the protection of  $\text{N}_2$ , and then the mixture was heated at 80 °C for 24 h. After the reaction was completed, the mixture was poured into water and extracted three times with ethyl acetate, and then the organic layer was dried by  $\text{MgSO}_4$ . After removal of the solvent under reduced pressure, the residue was purified by column chromatography on silica gel using ethyl acetate/petroleum ether (1:15) as eluent. The final product TTDB was obtained by recrystallization with ethanol as a white solid (1.33 g) in 75% yield. Molecular formula:  $\text{C}_{26}\text{H}_{27}\text{BO}_2$ .  $^1\text{H}$  NMR (600 MHz,  $\text{CDCl}_3$ )  $\delta$  (ppm) 7.34 (d, 2H), 7.32–7.28 (m, 3H), 7.13 (d, 2H), 7.10–7.03 (m, 6H), 6.97 (d, 2H), 1.13 (s, 12H).  $^{13}\text{C}$  NMR (150 MHz,  $\text{CDCl}_3$ )  $\delta$  (ppm) 151.40, 144.66, 141.69, 130.93, 129.42, 127.52, 126.77, 125.85, 83.69, 24.55. HRMS (ESI)  $m/z$ :  $[\text{M}+\text{H}]^+$  383.2182 (calcd. for  $\text{C}_{26}\text{H}_{27}\text{BO}_2$ ,  $[\text{M}+\text{H}]^+$  383.2104).

**Synthesis of ((E)-2-(2-(furan-2-yl)-1,2-diphenylvinyl)-4,4,5,5-tetramethyl-1,3,2-dioxaborolane) (FDTDB).** A mixture of (Z)-1,2-diphenyl-1,2-bis(4,4,5,5-tetramethyl-1,3,2-

dioxaborolan-2-yl)ethene (DTDB) (2.00 g, 4.63 mmol), 2-bromofuran (1.03 g, 6.95 mmol), potassium carbonate (1.28 g, 9.25 mmol) and Pd(PPh<sub>3</sub>)<sub>4</sub> (53.47 mg, 0.046 mmol) were added in a mixed solvent containing THF (80 mL) and toluene (50 mL) under the protection of N<sub>2</sub>, and then the mixture was heated at 80 °C for 24 h. After the reaction was completed, the mixture was poured into water and extracted three times with ethyl acetate, and then the organic layer was dried by MgSO<sub>4</sub>. After removal of the solvent under reduced pressure, the residue was purified by column chromatography on silica gel using ethyl acetate/petroleum ether (1:10) as eluent. The final product FDTDB was obtained by recrystallization with ethanol as a pale yellow solid (1.38 g) in 80% yield. Molecular formula: C<sub>24</sub>H<sub>25</sub>BO<sub>3</sub>. <sup>1</sup>H NMR (400 MHz, CDCl<sub>3</sub>) δ (ppm) 7.43 (s, 1H), 7.19–6.98 (m, 10H), 6.38 (s, 1H), 5.98 (s, 1H), 1.36 (s, 12H). <sup>13</sup>C NMR (150 MHz, CDCl<sub>3</sub>) δ(ppm) 156.13, 141.69, 140.46, 138.65, 137.73, 130.81, 129.33, 127.71, 127.11, 125.82, 111.78, 110.90, 84.08, 24.87. HRMS (ESI) m/z: [M+H]<sup>+</sup> 373.1987 (calcd. for C<sub>24</sub>H<sub>25</sub>BO<sub>3</sub>, [M+H]<sup>+</sup> 373.1897).

#### **Characterization of UV-Visible and Fluorescence Properties of All Samples.**

UV-vis absorption spectra were recorded using an Agilent Cary 5000 UV-Vis-NIR spectrophotometer. Steady PL spectra of all samples were performed on an Edinburgh Instruments model FLS980 fluorescence spectrophotometer equipped with a xenon arc lamp using a front face sample holder. Time-resolved fluorescence measurements were conducted with EPL-series lasers. The absolute PL quantum yields of all samples were determined using an integrating sphere equipped in FLS980 spectrophotometer for at least three times.

## 2. Supplementary Schemes and Figures

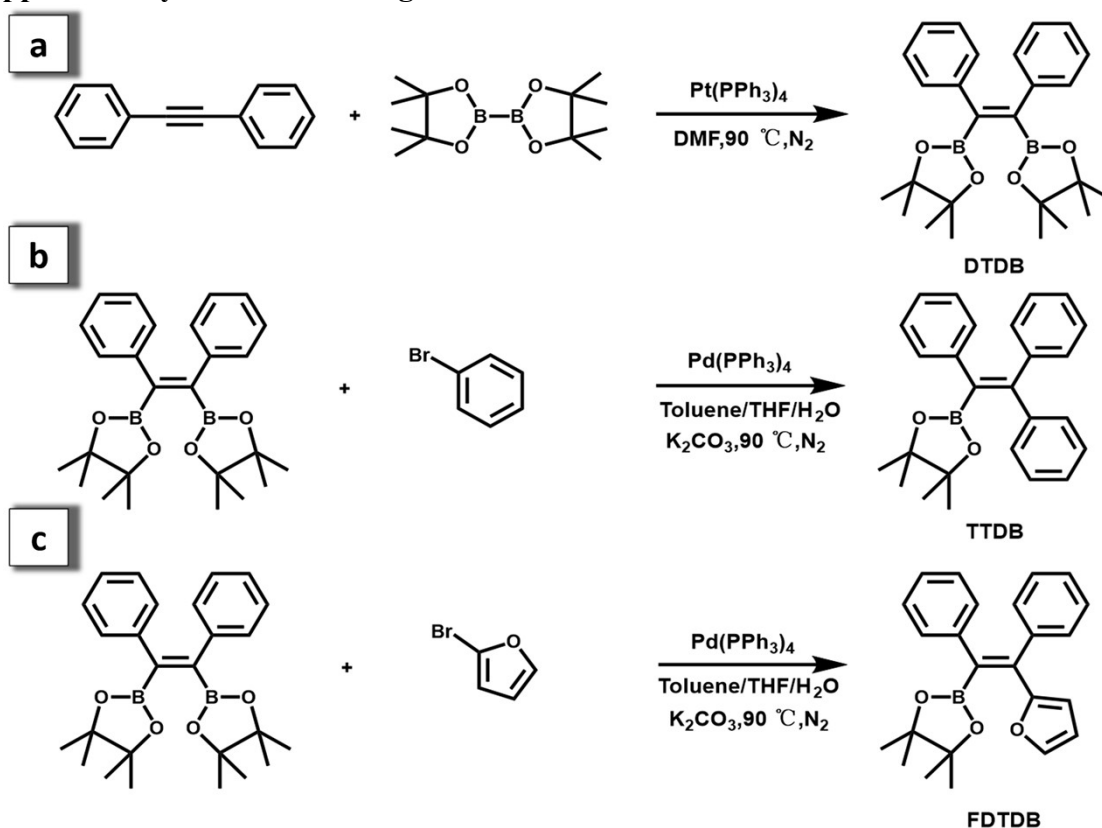

**Scheme S1.** Synthesis routes of DTDB (a), TTDB (b), and FDTDB (c).

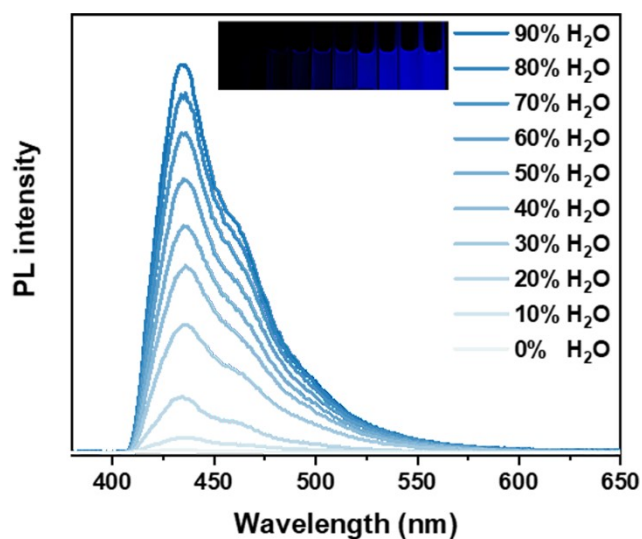

**Figure S1.** PL intensity spectra and images of FDTDB in THF (50.0 mM) with increasing amounts of water from 0% to 90%.

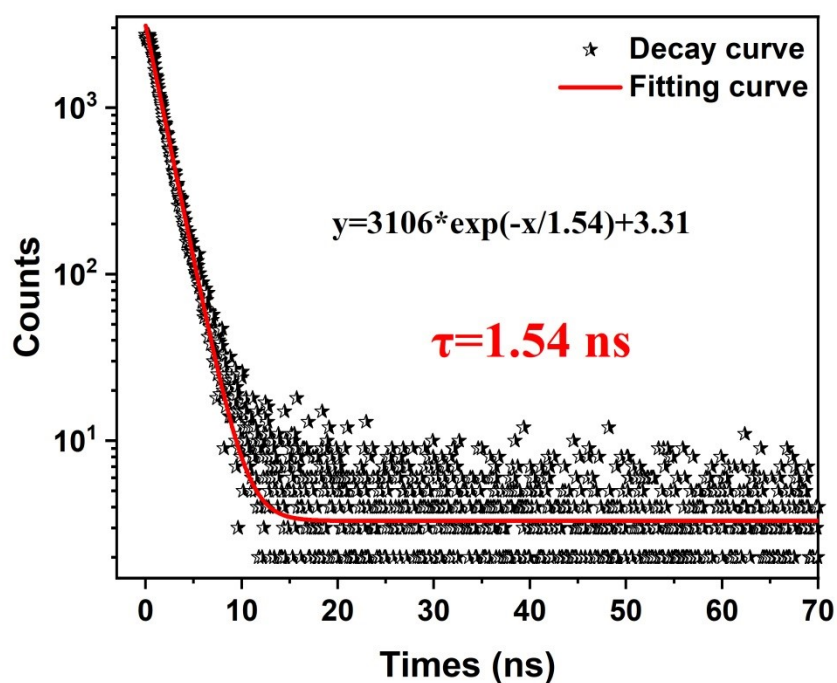

**Figure S2.** Time-resolved PL decay curve of FDTDB in solid state.

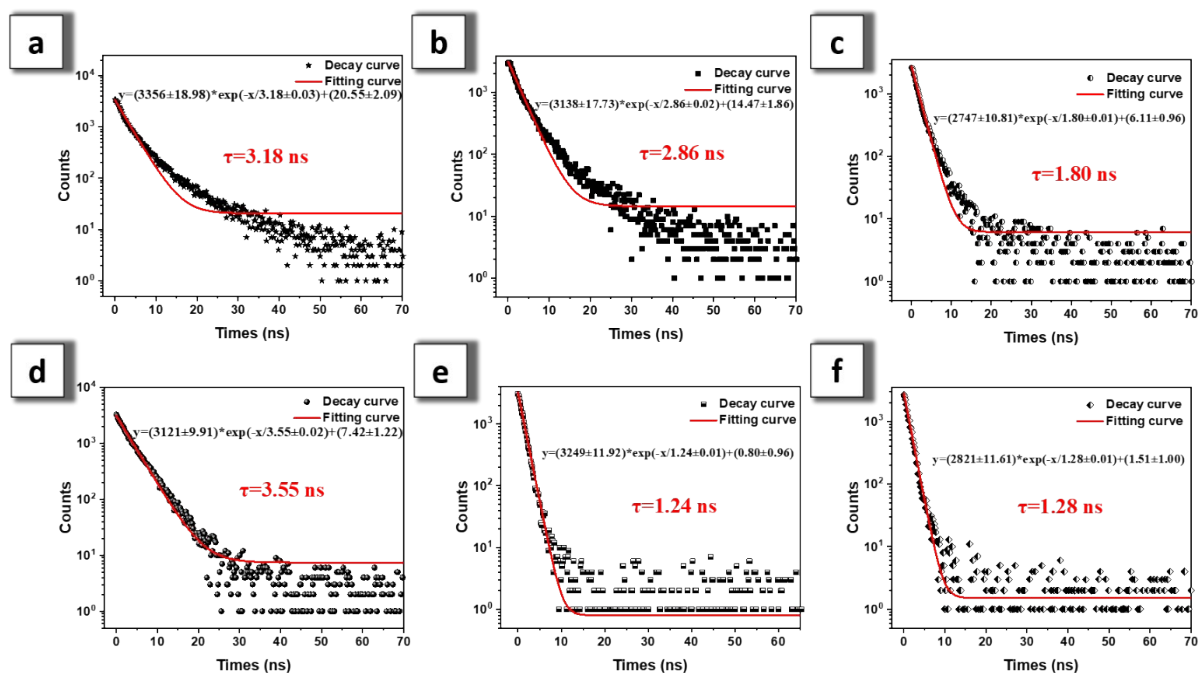

**Figure S3.** Time-resolved PL decay curves of (a) DTDB-2F, (b) TTDB-F, and (c) FDTDB-F in dispersed state, and (d) DTDB-2F, (e) TTDB-F, and (f) FDTDB-F in THF solution (500  $\mu\text{M}$ ).

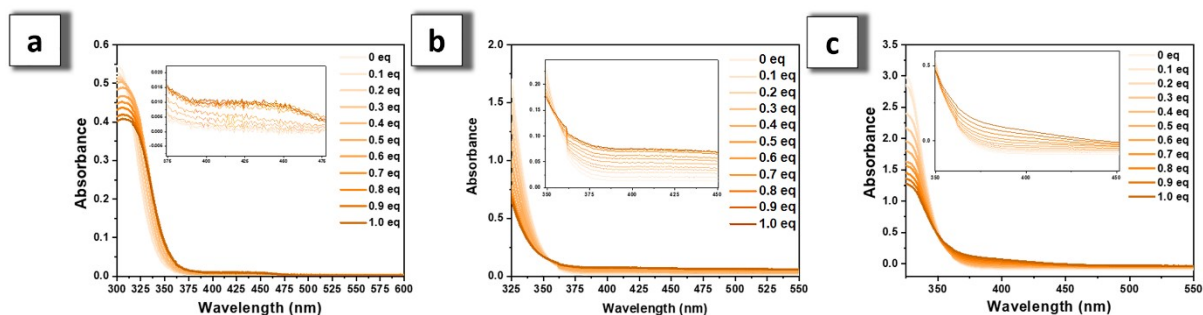

**Figure S4.** Changes in UV-Vis absorption spectra of (a) DTDB (500  $\mu\text{M}$ ), (b) TTDB (500  $\mu\text{M}$ ) and (c) FDTDB (500  $\mu\text{M}$ ) in THF solution upon addition 0-1 eq. of TBAF.

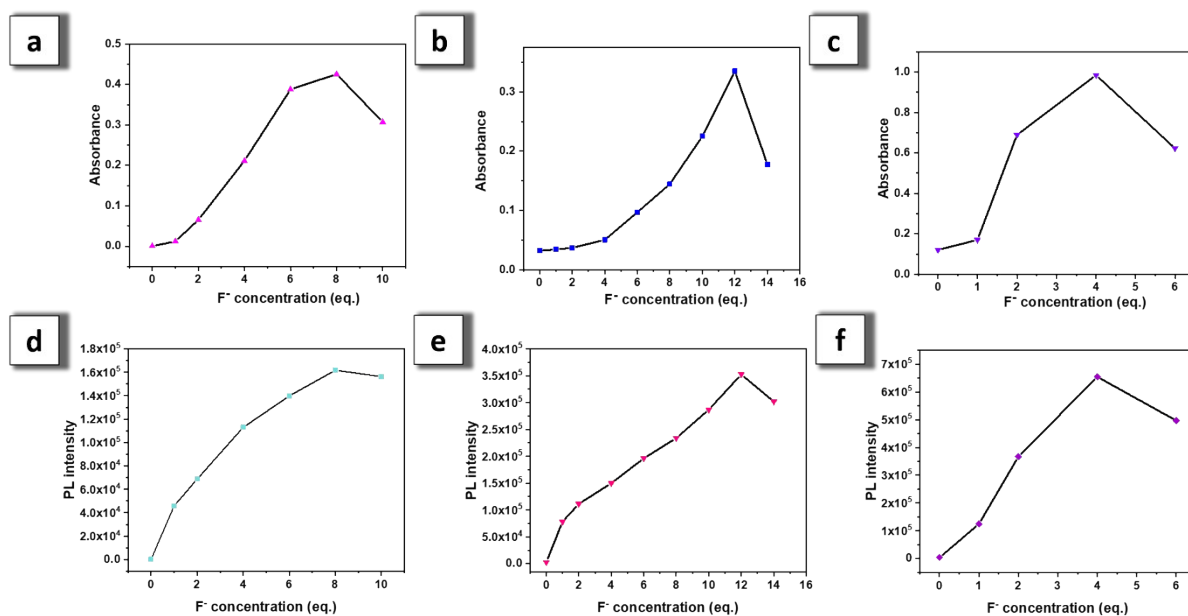

**Figure S5.** A line graph of PL intensity and  $\text{F}^-$  concentration of DTDB (a), TTDB(b) and FDTDB(c) in THF (500  $\mu\text{M}$ ). A line graph of Absorbance and  $\text{F}^-$  concentration of DTDB (d), TTDB(e) and FDTDB(f) in THF (500  $\mu\text{M}$ ).

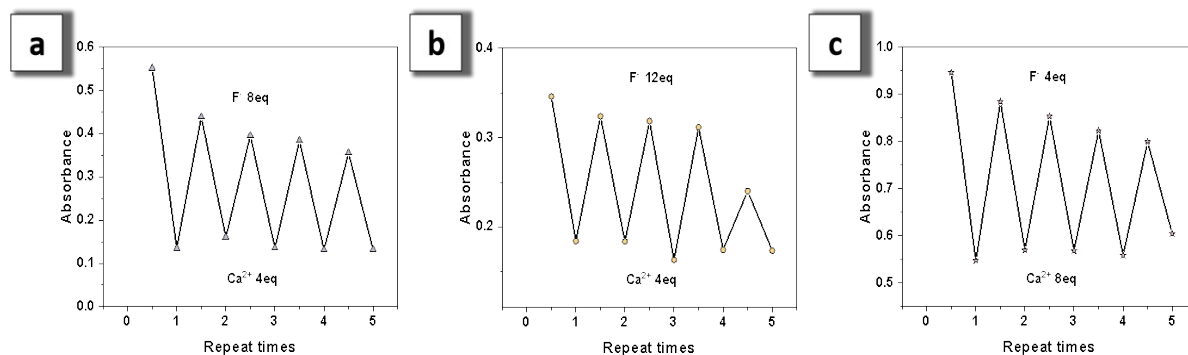

**Figure S6.** Recycling of DTDB (a), TTDB (b), and FDTDB (c) in THF solution (500  $\mu\text{M}$ ) as a function of addition  $\text{F}^-$  (TBAF) and  $\text{Ca}^{2+}$  ( $\text{CaCl}_2$ ) respectively.

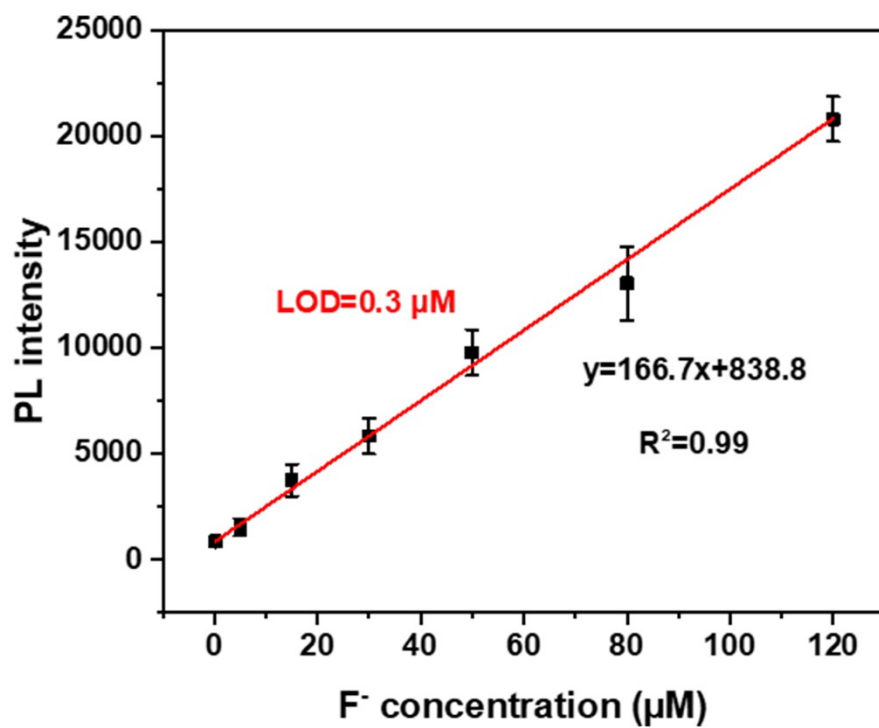

**Figure S7.** Calibration curve between PL intensity and  $\text{F}^-$  concentration in the scope of 1.1–120.0  $\mu\text{M}$ .

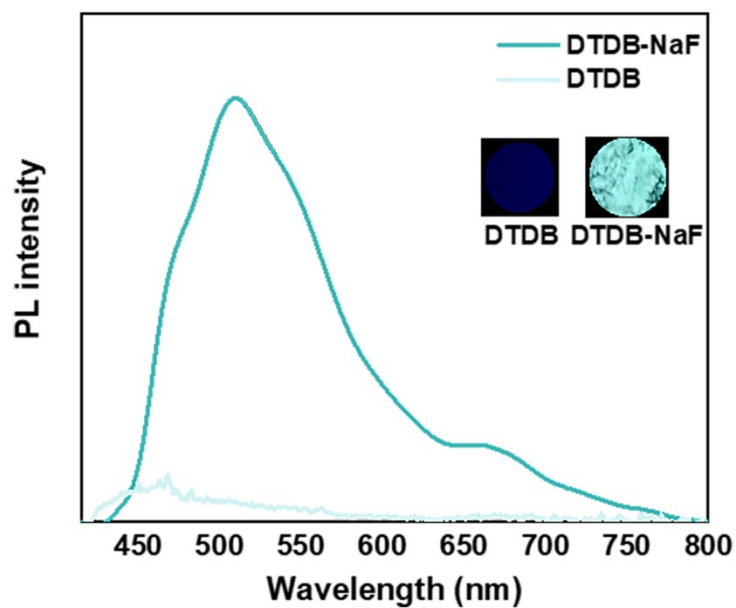

**Figure S8.** Change in PL spectra of DTDB in solid state upon addition of NaF. Insets: Fluorescent photographs of these solids were taken under UV light.

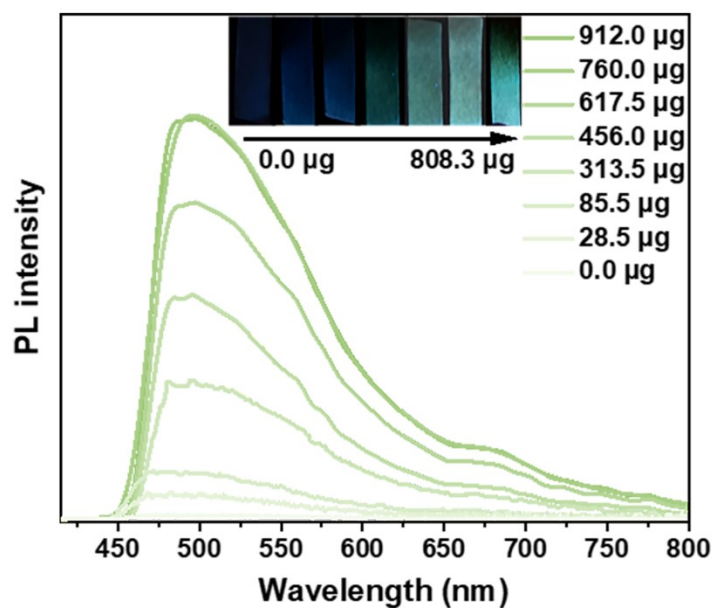

**Figure S9.** Change in PL spectra of DTDB in filter papers increasing the content of fluoride ion (NaF). Insets: Photographs showing fluorescence change after adding different amounts of fluoride ion from 0  $\mu\text{g}$  to 912.0  $\mu\text{g}$ .

### 3. NMR and HRMS Spectra of Compounds

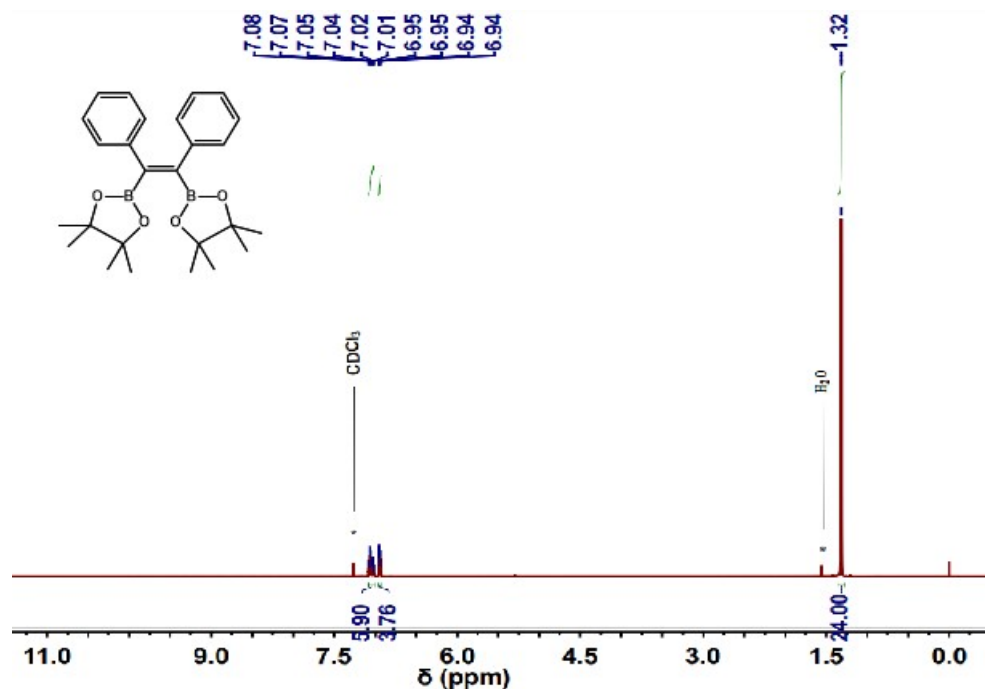

**Figure S10.**  $^1\text{H}$  NMR spectrum of (Z)-1,2-diphenyl-1,2-bis(4,4,5,5-tetramethyl-1,3,2-dioxaborolan-2-yl)ethene) (DTDB) in CDCl<sub>3</sub>

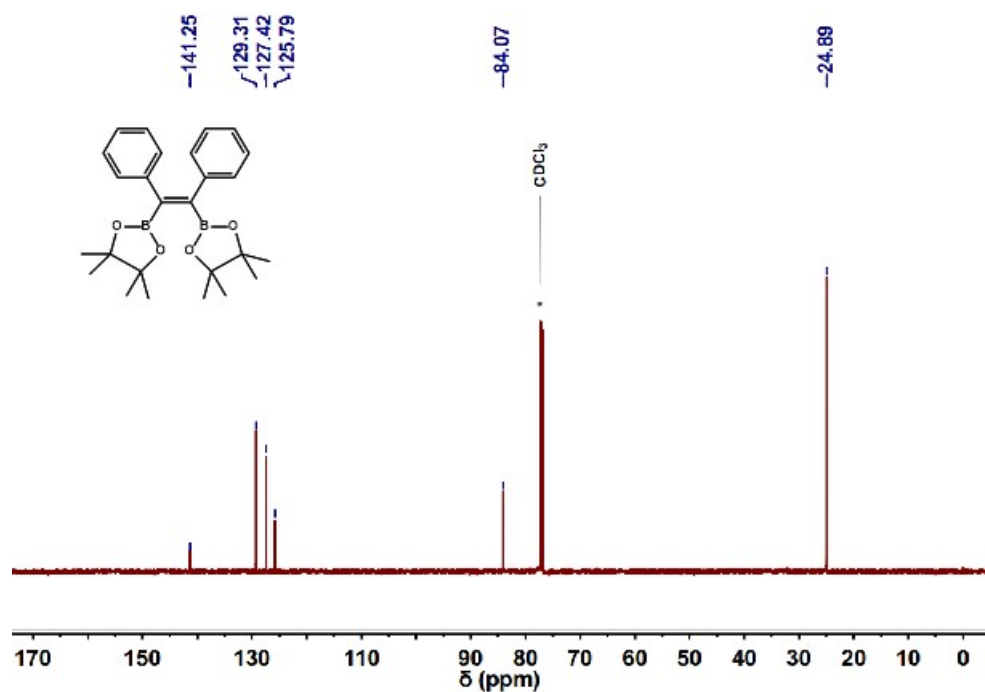

**Figure S11.**  $^{13}\text{C}$  NMR spectrum of (Z)-1,2-diphenyl-1,2-bis(4,4,5,5-tetramethyl-1,3,2-dioxaborolan-2-yl)ethene) (DTDB) in CDCl<sub>3</sub>

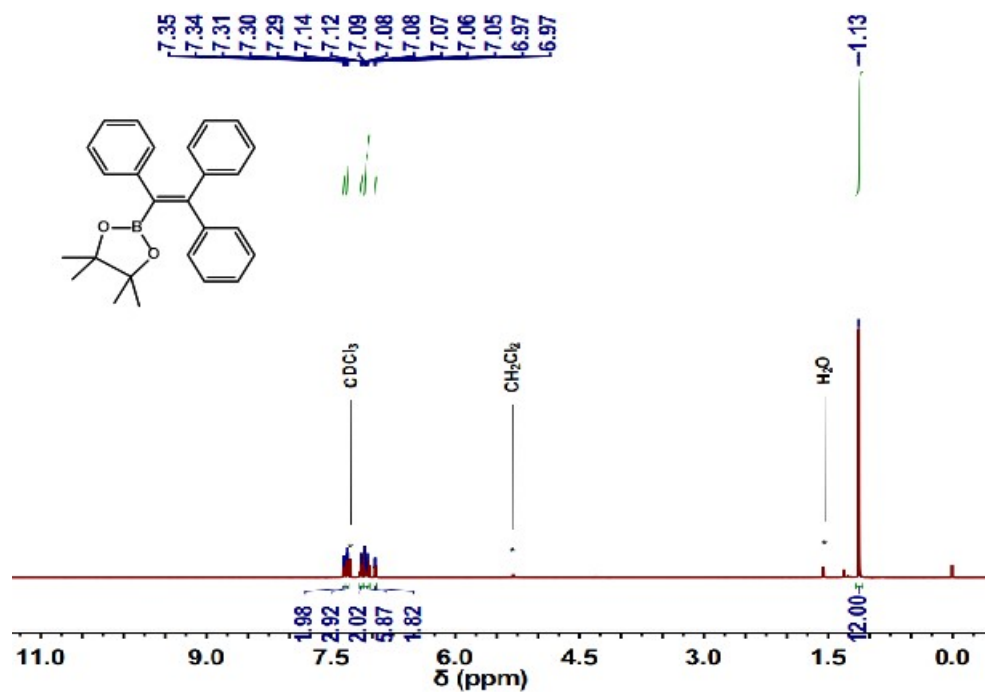

**Figure S12.** <sup>1</sup>H NMR spectrum of (4,4,5,5-tetramethyl-2-(1,2,2-triphenylvinyl)-1,3,2-dioxaborolane) (TTDB) in CDCl<sub>3</sub>

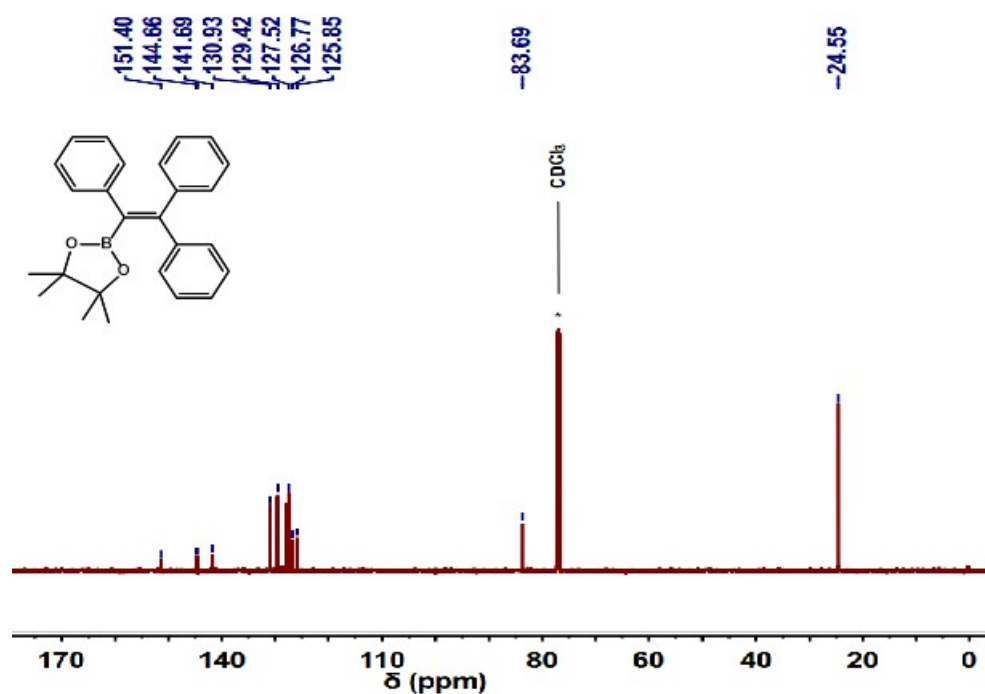

**Figure S13.** <sup>13</sup>C NMR spectrum of (4,4,5,5-tetramethyl-2-(1,2,2-triphenylvinyl)-1,3,2-dioxaborolane) (TTDB) in CDCl<sub>3</sub>

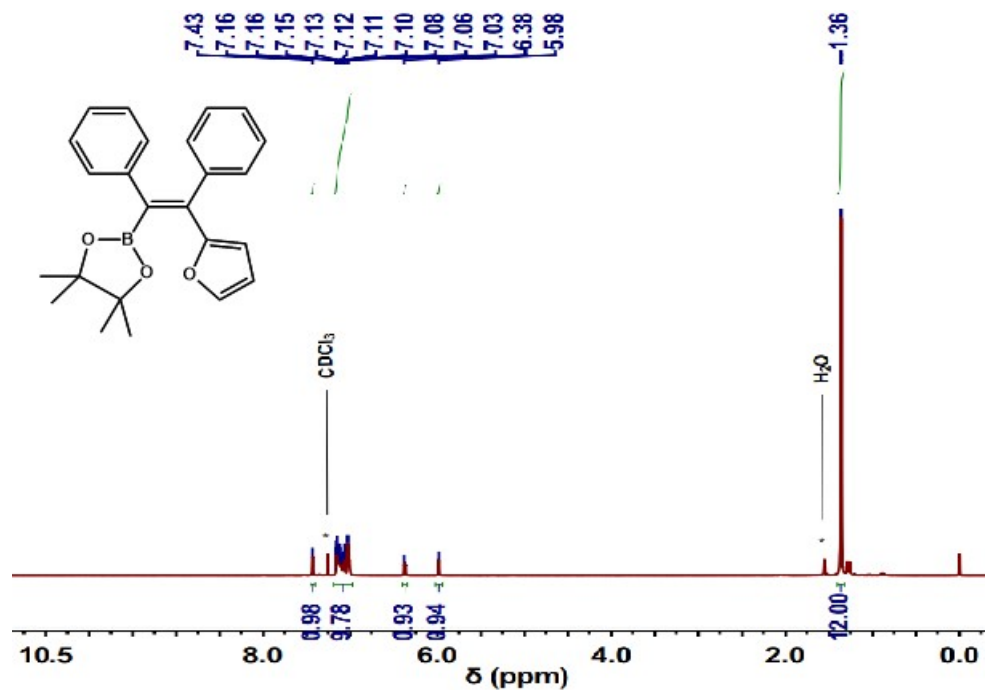

**Figure S14.**  $^1\text{H}$  NMR spectrum of (E)-2-(2-(furan-2-yl)-1,2-diphenylvinyl)-4,4,5,5-tetramethyl-1,3,2-dioxaborolane (FDTDB) in  $\text{CDCl}_3$

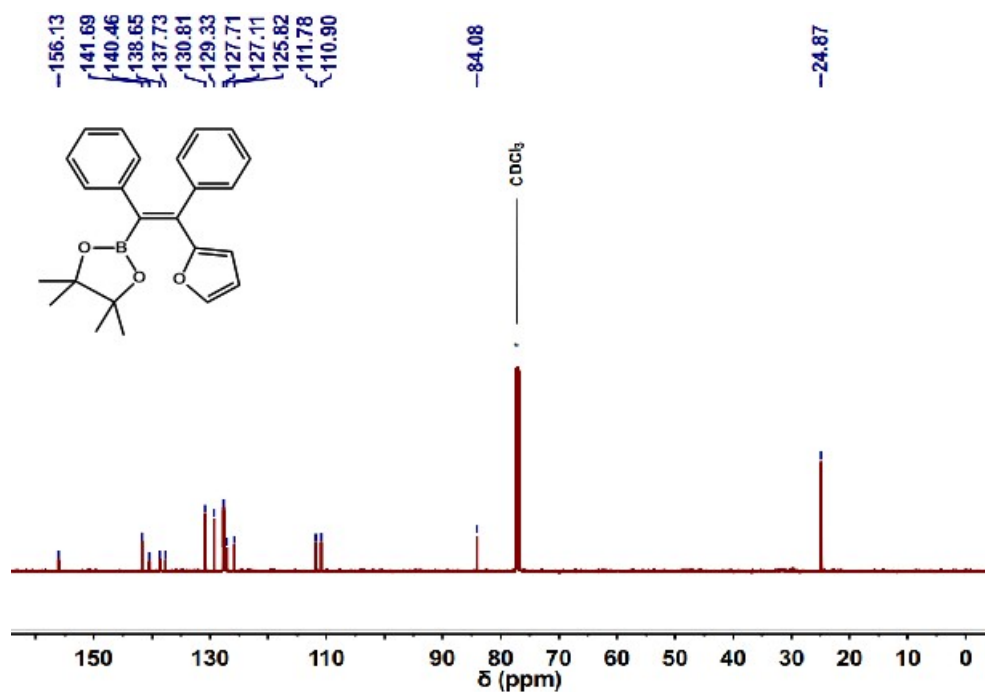

**Figure S15.**  $^{13}\text{C}$  NMR spectrum of (E)-2-(2-(furan-2-yl)-1,2-diphenylvinyl)-4,4,5,5-tetramethyl-1,3,2-dioxaborolane (FDTDB) in  $\text{CDCl}_3$

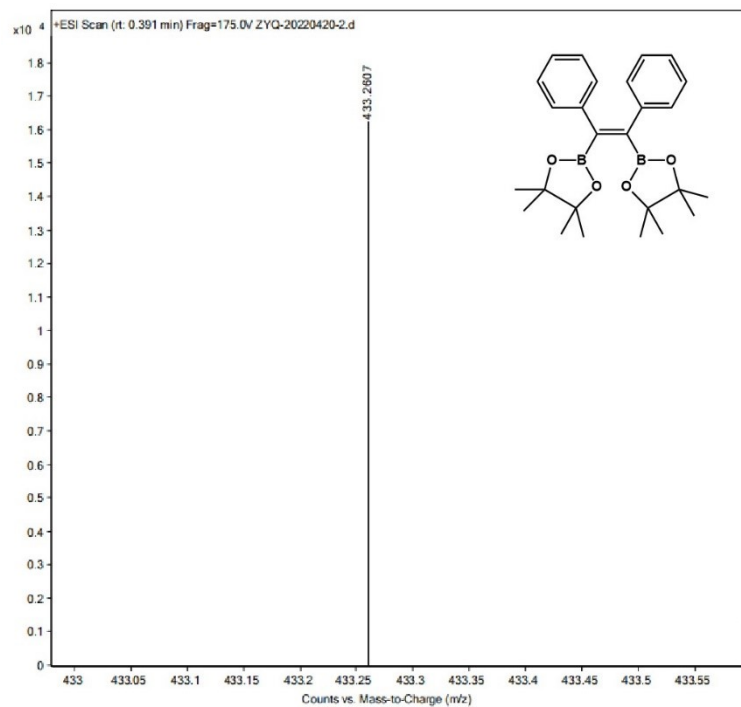

**Figure S16.** High-resolution mass spectrum of (Z)-1,2-diphenyl-1,2-bis(4,4,5,5-tetramethyl-1,3,2-dioxaborolan-2-yl)ethene) (DTDB)

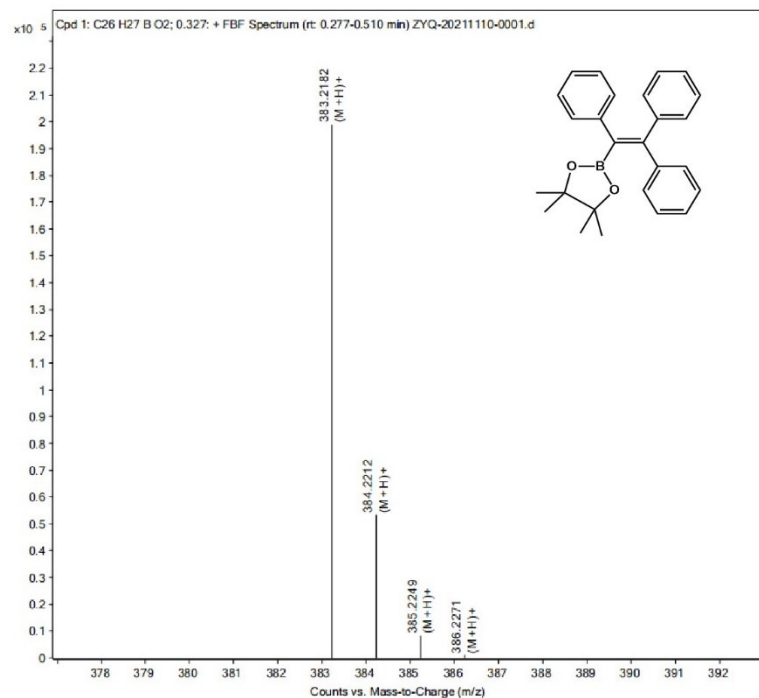

**Figure S17.** High-resolution mass spectrum of (4,4,5,5-tetramethyl-2-(1,2,2-triphenylvinyl)-1,3,2-dioxaborolane) (TTDB)

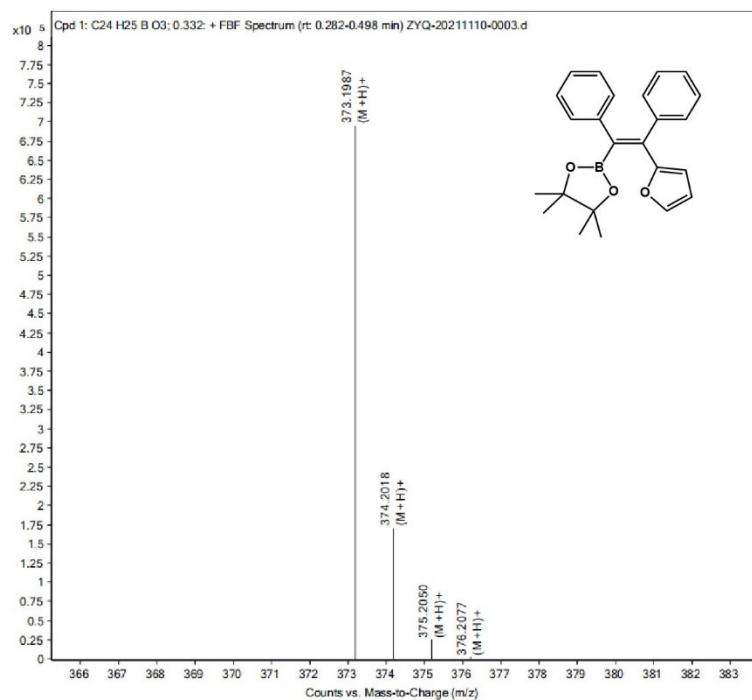

**Figure S18.** High-resolution mass spectrum of (E)-2-(2-(furan-2-yl)-1,2-diphenylvinyl)-4,4,5,5-tetramethyl-1,3,2-dioxaborolane (FDTDB)
